# Supplementary material
Source: HighWire-hosted journal article supplement (https://www.cmaj.ca/highwire/filestream/69799/field_highwire_adjunct_files/0/170892-res-visual-abstract.pdf)
Supplement: 170892-res-visual-abstract.pdf [file 170892-res-visual-abstract.pdf]

# HOME CARE VISITS & SAME-DAY EMERGENCY DEPARTMENT USE

## A VISUAL RESEARCH ABSTRACT

### Case-crossover study

Within individuals:  
days with an ED visit  
after 5 pm matched  
with control days  
from previous week

Home care needs  
cohort stratified:

- ongoing (chronic)
- short-term (acute)

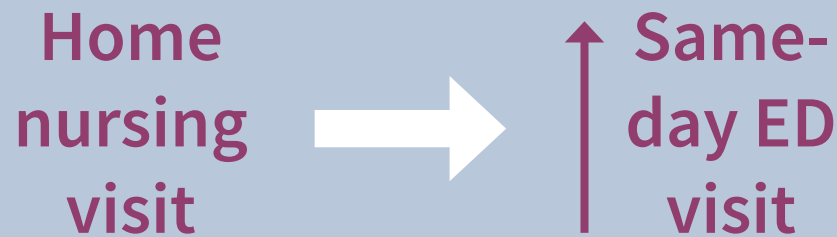

**1.3x** For chronic care patients

**1.2x** For acute care patients

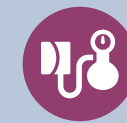

After other types of home visits (e.g. personal support), patients were no more likely to visit the ED.

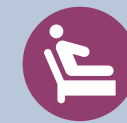

Analyzing only ED visits that resulted in hospital admission showed no significant association.

Increased access to publicly funded home care has been suggested as a way to reduce unnecessary visits to the ED. This study found that patients were more likely to visit the ED during the evening on days they received a home care visit from a nurse.
